# Supplementary material for: Single-cell transcriptome sequencing for opening the blood-brain barrier through specific mode electroacupuncture stimulation
Source: eLife. 2025 Oct 24;14:RP107938. doi: 10.7554/eLife.107938 (PMC12552013; doi:10.7554/eLife.107938)
Supplement: Supplementary file 2. [file elife-107938-supp2.docx]

**Supplementary File 2. Pathway analysis for genes upregulated by SMES only in EC_cluster0**

| **Gene Name** | **Gene Functional Annotation** | **Q.value** |
| --- | --- | --- |
| S100b | astrocyte differentiation | 0.047090205 |
| calcium ion binding | 0.036073527 |
| RAGE receptor binding | 0.03999733 |
| Dnaja1 | heat shock protein binding | 4.6715E-05 |
| low-density lipoprotein particle receptor binding | 0.000203237 |
| Hsp70 protein binding | 0.02244097 |
| G protein-coupled receptor binding | 0.02250692 |
| Aldoc | cytoskeletal protein binding | 0.033981815 |
| Hsph1 | negative regulation of intrinsic apoptotic signaling pathway in response to hydrogen peroxide | 0.027868317 |
| negative regulation of p38MAPK cascade | 0.034043282 |
| heat shock protein binding | 4.6715E-05 |
| Hsp90ab1 | cellular response to interleukin-4 | 0.008538995 |
| regulation of type I interferon-mediated signaling pathway | 0.027868317 |
| regulation of type II interferon-mediated signaling pathway | 0.034043282 |
| Stip1 | Hsp90 protein binding | 0.01704401 |
| Hsp70 protein binding | 0.02244097 |
| Hspa5 | cellular response to interleukin-4 | 0.008538995 |
| cellular response to calcium ion | 0.024673147 |
| cellular response to cAMP | 0.027391704 |
| extracellular matrix | 0.00015723 |
| focal adhesion | 0.027868317 |
| heat shock protein binding | 4.6715E-05 |
| Hspa8 | positive regulation of phagocytosis | 0.017880273 |
| extracellular matrix | 0.00015723 |
| heat shock protein binding | 4.6715E-05 |
| G protein-coupled receptor binding | 0.02250692 |
| A1 adenosine receptor binding | 0.03999733 |
| P4ha1 | iron ion binding | 0.049215868 |
| Calr | positive regulation of phagocytosis | 0.017880273 |
| positive regulation of dendritic cell chemotaxis | 0.043359962 |
| extracellular matrix | 0.00015723 |
| focal adhesion | 0.027868317 |
| calcium ion binding | 0.036073527 |
| iron ion binding | 0.049215868 |
| Tf | positive regulation of receptor-mediated endocytosis | 0.009996979 |
| cellular response to cAMP | 0.027391704 |
| cellular response to iron ion | 0.043359962 |
| extracellular region | 0.002111889 |
| HFE-transferrin receptor complex | 0.036073527 |
| cell tip | 0.036073527 |
| ferric iron transmembrane transporter activity | 0.015409729 |
| transferrin receptor binding | 0.047090205 |
| Clu | positive regulation of receptor-mediated endocytosis | 0.009996979 |
| microglial cell proliferation | 0.02250692 |
| extracellular matrix | 0.00015723 |
| extracellular region | 0.002111889 |
| cell periphery | 0.002490811 |
| low-density lipoprotein particle receptor binding | 0.000203237 |
| Cryab | stress-activated MAPK cascade | 0.047090205 |
| cytoskeletal protein binding | 0.033981815 |
| Mbp | positive regulation of chemokine (C-X-C motif) ligand 2 production | 0.015409729 |
| maintenance of blood-brain barrier | 0.034043282 |
| cell periphery | 0.002490811 |
| Hspb1 | cellular response to interleukin-11 | 0.02250692 |
| response to angiotensin | 0.034043282 |
| positive regulation of endothelial cell chemotaxis by VEGF-activated vascular endothelial growth factor receptor signaling pathway | 0.036073527 |
| positive regulation of endothelial cell chemotaxis | 0.036073527 |
| positive regulation of interleukin-1 beta production | 0.03999733 |
| positive regulation of tumor necrosis factor production | 0.043359962 |
| extracellular matrix | 0.00015723 |
| focal adhesion | 0.027868317 |
| Lyve1 | cell periphery | 0.002490811 |
| Cxcl14 | extracellular region | 0.002111889 |
