# Supplementary material for: Single-cell transcriptome sequencing for opening the blood-brain barrier through specific mode electroacupuncture stimulation
Source: eLife. 2025 Oct 24;14:RP107938. doi: 10.7554/eLife.107938 (PMC12552013; doi:10.7554/eLife.107938)
Supplement: Supplementary file 3. [file elife-107938-supp3.docx]

**Supplementary File 3. Pathway analysis for genes upregulated only in EC_cluster2**

| Psap | Extracellular matrix | 0.00018412 |
| --- | --- | --- |
| Extracellular region | 0.000548325 |
| Mt-co3 | Oxidoreduction-driven active transmembrane transporter activity | 0.014827033 |
| Pdia4 | Chaperone-mediated protein folding | 2.31652E-07 |
| Protein folding | 1.98193E-05 |
